# Supplementary material for: Hydrothermal synthesis of hierarchical core–shell manganese oxide nanocomposites as efficient dye adsorbents for wastewater treatment
Source: Royal Society of Chemistry journal article supplement (doi:10.1039/c5ra08678g), 2015-01-01
Supplement: c5ra08678g1.pdf [file c5ra08678g1.pdf]

## Supporting Information

### Hydrothermal synthesis of hierarchical core-shell manganese oxide nanocomposites as efficient dye adsorbents for wastewater treatment

Wei Wang,<sup>a,b</sup> Tifeng Jiao,<sup>\*a,b,c</sup> Qingrui Zhang,<sup>\*b</sup> Xiaona Luo,<sup>b</sup> Jie Hu,<sup>b</sup> Yan Chen,<sup>b</sup> Qiuming Peng,<sup>a</sup> Xuehai Yan<sup>c</sup> and Bingbing Li<sup>\*d</sup>

<sup>a</sup> *State Key Laboratory of Metastable Materials Science and Technology, Yanshan University, Qinhuangdao 066004, P. R. China. E-mail: tfjiao@ysu.edu.cn*

<sup>b</sup> *Hebei Key Laboratory of Applied Chemistry, School of Environmental and Chemical Engineering, Yanshan University, Qinhuangdao 066004, P. R. China. E-mail: zhangqr@ysu.edu.cn*

<sup>c</sup> *National Key Laboratory of Biochemical Engineering, Institute of Process Engineering, Chinese Academy of Sciences, Beijing 100190, P. R. China.*

<sup>d</sup> *Department of Chemistry and Biochemistry, Science of Advanced Materials Doctoral Program, Central Michigan University, Mount Pleasant, MI 48859, USA. E-mail: li3b@cmich.edu*

**Table S1.** Physical properties deduced from N<sub>2</sub> adsorption at 77 K of as-prepared nanocomposites samples.

| Samples                                                 | BET Surface area (m <sup>2</sup> /g) | Average pore volume (cm <sup>3</sup> /g) | Average pore diameter (nm) |
|---------------------------------------------------------|--------------------------------------|------------------------------------------|----------------------------|
| MnO <sub>2</sub>                                        | 40.5                                 | 0.154                                    | 15.215                     |
| Fe <sub>3</sub> O <sub>4</sub> @MnO <sub>2</sub> at 3h  | 60.3                                 | 0.148                                    | 12.438                     |
| Fe <sub>3</sub> O <sub>4</sub> @MnO <sub>2</sub> at 6h  | 72.5                                 | 0.143                                    | 7.878                      |
| Fe <sub>3</sub> O <sub>4</sub> @MnO <sub>2</sub> at 9h  | 63.2                                 | 0.151                                    | 13.254                     |
| Fe <sub>3</sub> O <sub>4</sub> @MnO <sub>2</sub> at 15h | 59.6                                 | 0.146                                    | 13.461                     |
| Fe <sub>2</sub> O <sub>3</sub> @MnO <sub>2</sub> at 6h  | 52.2                                 | 0.118                                    | 14.716                     |

**Table S2.** Kinetic parameters for MB and RhB absorptions onto different nanocomposites at 298 K (experimental data from Fig. 6).

| MB                                               | Pseudo-first-order model |       |                      | Pseudo-second-order model |       |                |
|--------------------------------------------------|--------------------------|-------|----------------------|---------------------------|-------|----------------|
|                                                  | $q_e$                    | $R^2$ | $K_1 (x 10^2)$       | $q_e$                     | $R^2$ | $K_2 (x 10^2)$ |
|                                                  | (mg/g)                   |       | (min <sup>-1</sup> ) | (mg/g)                    |       | (g/min·h)      |
| Fe <sub>3</sub> O <sub>4</sub> /MnO <sub>2</sub> | 9.24                     | 0.946 | 32.2                 | 9.71                      | 0.999 | 6.97           |
| Fe <sub>2</sub> O <sub>3</sub> /MnO <sub>2</sub> | 8.87                     | 0.944 | 26.4                 | 9.70                      | 0.996 | 3.69           |
| MnO <sub>2</sub>                                 | 7.90                     | 0.972 | 2.98                 | 9.36                      | 0.975 | 0.411          |
| RhB                                              | Pseudo-first-order model |       |                      | Pseudo-second-order model |       |                |
|                                                  | $q_e$                    | $R^2$ | $K_1 (x 10^2)$       | $q_e$                     | $R^2$ | $K_2 (x 10^2)$ |
|                                                  | (mg/g)                   |       | (min <sup>-1</sup> ) | (mg/g)                    |       | (g/min·h)      |
| Fe <sub>3</sub> O <sub>4</sub> /MnO <sub>2</sub> | 1.69                     | 0.947 | 2.36                 | 2.05                      | 0.988 | 1.31           |
| Fe <sub>2</sub> O <sub>3</sub> /MnO <sub>2</sub> | 1.55                     | 0.963 | 2.26                 | 1.86                      | 0.991 | 1.42           |
| MnO <sub>2</sub>                                 | 1.48                     | 0.980 | 1.35                 | 1.85                      | 0.977 | 0.788          |
